# Supplementary material
Source: Springer Nature journal article supplement (https://www.springermedizin.de/resource/supplementary/12962_2013_198_MOESM6_ESM.pdf/9571898)

Criteria on good reporting of economic evaluations

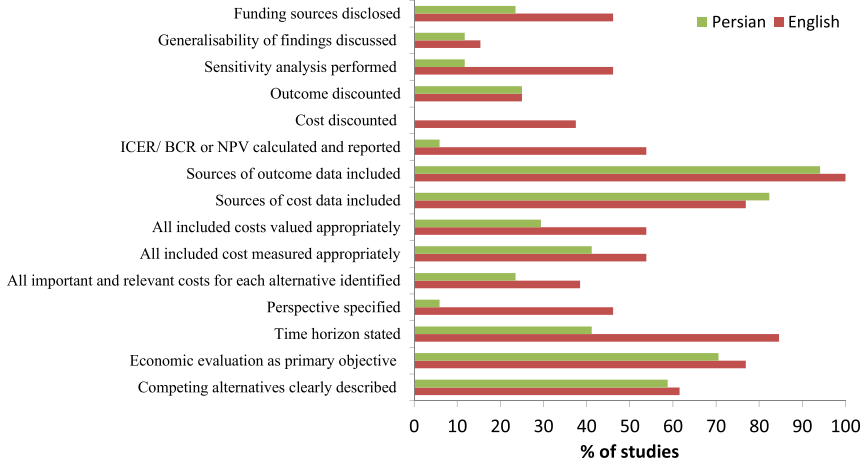

Supplement: MOESM6 [file 9571898]
